1      **A novel green approach for treatment of immature Schistosomiasis**  
2                      **Mansoni infection in mice; Arabic gum (Acacia Senegal)**  
3                                      **antischistosomal properties**

4      Rabab Selem<sup>1</sup>, Samia Rashed<sup>1</sup>, Mohammad Younis<sup>1</sup>, Boshra Hussien<sup>2</sup>, Fatma Mohamed<sup>3</sup>,  
5      Awatif Edrees<sup>4</sup>, Asmaa EL-kholy<sup>1</sup>, Gehan Rashed<sup>1</sup>, Shereen Kishik<sup>1</sup>, Ahlam Moharm<sup>1</sup>,  
6                                      Marwa Nageeb<sup>1</sup>, Manal Kardoush<sup>1\*</sup>

7      **Affiliations:**

8      <sup>1</sup>Parasitology Department, Faculty of Medicine, Benha University, Egypt

9      <sup>2</sup>Tropical Medicine Department, Faculty of Medicine, Tanta University, Egypt

10      <sup>3</sup>Tropical Medicine Department, Faculty of Medicine for girls, Al-Azhar University,  
11      Egypt

12      <sup>4</sup>Tropical Medicine Department, Faculty of Medicine, Tanta University, Egypt

13      \* Corresponding Author

14      Manal Kardoush

15      Email: [manal.hassan@mail.mcgill.ca](mailto:manal.hassan@mail.mcgill.ca)

16      Telephone: 0014389226898

17      Mail address: Parasitology Department, Faculty of Medicine, Benha University, Benha,  
18      Egypt. 13518

19      Authors contributed equally to this work.

20

21

22

23

24

25      **Abstract**

Schistosomiasis is one of the most socioeconomically exhausting parasitic infection in tropical and subtropical areas. Praziquantel (PZQ), the only common schistosomicidal drug in use, is not efficient enough for treatment of immature infection. Arabic gum (AG) is a complex polysaccharide acts as anti-oxidant which modulates the inflammatory and/or immunological processes. This study explores for the first time, the antischistosomal properties of AG in mice infected with the immature stage of *Schistosoma mansoni*. Mice were divided into four groups: control group (infected non-treated), AG treated group, PZQ treated group, and AG+PZQ treated group. Oral administration of AG in a dose of 1gm/kg body weight, daily for 3 consecutive weeks post-infection (p.i.) resulted in a statistically significant lower worm burden in both AG group and AG+PZQ group compared to PZQ and control groups. AG+PZQ group always showed the best performance when compared with other groups regarding tissue egg load and oogram pattern. AG, both alone and in combination with PZQ, decreased the number, diameter; increased the cellularity and the number of degenerated *Schistosoma* eggs inside granulomas. Results obtained by this work elucidated a promising AG bioactivity against *S. mansoni* immature stages and provided a platform for subsequent experimental studies to illuminate the academia more about this novel and "green" antischistosomal agent.

## Author summary

Schistosomiasis is a major public health threat in many parts of the world, it affects more than 240 million people in more than 70 countries and almost 800 million people are at risk of acquiring this disease. Serious consequences and disabilities might

result from untreated schistosomiasis such as hepatosplenic fibrosis with portal hypertension, gastrointestinal hemorrhage and death.

Schistosomiasis control is focused on periodic treatment with praziquantel (PZQ). However, PZQ has only moderate action against young developing stages of schistosomula. Recently, resistance has emerged to PZQ. Therefore, chemotherapy alone is unlikely to reduce infection levels of schistosomiasis. Several practical approaches have been suggested to augment treatment programs. Of course, the development of a complementary treatment would contribute enormously to the reduction of schistosomiasis. Recently, natural products have been popular and attracted most of the attention as it could offer new effective therapy against schistosomiasis. Arabic gum (AG) is an edible, dried sticky exudate from *Acacia Senegal*, which is used in this study to assess the AG antischistosomal properties. Our study revealed that AG has an excellent statistically significant effect against immature murine schistosomiasis, both alone and in combination with PZQ. This approach may point to novel targets for treatment of schistosomiasis.

#### **Key words:**

*Schistosoma mansoni*, Immature stages, Arabic gum, Antischistosomal properties, Mice.

#### **Introduction**

Schistosomiasis is the most common disease caused by parasitic worms, known as blood flukes, it affects over 240 million people around the world with almost 800 million are at risk of infection [1]. Serious consequences and disabilities might result from

untreated schistosomiasis such as chronic malnutrition, anemia, organ scarring and fibrosis [2].

Control of such long-term morbidity is a priority of the World Health Organization (WHO), it adapts a preventive strategy via mass drug administration campaigns [3]. Praziquantel is the drug of choice for treating all species of *Schistosoma*. Unfortunately, some strains have developed a resistance against it making their treatment a challenge [4-7]. Although praziquantel is highly effective against adult schistosomes and very early stage of schistosomula just few hours after penetration into the host's skin, it is much less effective against young developing stages of schistosomula [8], Thus, it is essential to develop a new irresistible alternative lacking the aforementioned drawbacks [9].

Arabic gum (AG) is a dried exudate obtained from stems and branches of *Acacia senegal* (Leguminosae), consisting of calcium, magnesium, and potassium salts of the polysaccharide Arabic gum acid [10]. It has been used in Arabic folk medicine to treat patients suffering from chronic renal failure as it decreases the requirements as well as the frequency of hemodialysis [11]. US Food and Drug Administration have listed AG as one of the safest dietary fibers [12].

Different studies showed that AG can modulate TGF- $\beta$ 1 generation and function [13], stimulated mouse dendritic cells [14], control chemical plaque in subjects with gingivitis [15], and exert a cytoprotection against Hg-induced nephrotoxicity [16].

Other studies reported several favorable renal effects including reduced plasma phosphate concentration, blood pressure, proteinuria, as well as extra renal effects such as slowing of intestinal glucose transport, which might be of value in the prevention and

treatment of obesity and diabetes [17, 18]. It has been also reported to induce fetal hemoglobin in sickle cell anemia [19], prevents and enhances healing of gastric ulcers [20], influences the expression of murine ovarian oxidative stress gene [21] and improves semen quality and oxidative stress capacity in alloxan-induced diabetes in rats [22].

As antimicrobial agent, AG was reported to be an efficient antimicrobial agent, of a natural origin, against many buccal microorganisms such as *Prophyromonas gingivalis* and *Prevotella intermedia* [23] fungi as *Candida albicans*, *Aspergillus niger* and *Microsporum canis* [24] bacteria as *Staphylococcus aureus*, *Staphylococcus epidermidis*, *Streptococcus pneumoniae*, *Salmonella typhi*, *Ps. aeruginosa*, [25]. As far as we know, only one published parasitological study has investigated the antimalarial effect of AG, it stated that AG slightly, yet, significantly decreased the parasitaemia and significantly expanded the life span of the infected mice [26].

The aim of this study was to explore and evaluate the antischistosomal properties of AG in mice infected with *Schistosoma mansoni* at the immature stage.

## Materials and methods

A pilot study was done on about 30 mice 2 months before the main experiment to assess if there is any antischistosomal activity of AG which has been given as 10% in the drinking bottles for 3 weeks starting from the day of infection. The results of AG on the scale of total worm load was remarkable and encouraging to launch the main experiment.

## Parasites and animals

Fifty laboratory-bred male Swiss albino mice, CD1 bred, were used in this study, as this was the minimum required number to guarantee statistically reliable and reproducible results. Cercariae of *S. mansoni* were obtained from infected *Biomphalaria*

*alexandrina* snails, which were reared and maintained at Schistosome Biological Supply Program (SBSP), Theodor Bilharz Research Institute (TBRI), Giza, Egypt. Each mouse was infected with 80 *S. mansoni* cercariae suspended in 0.2 ml water via subcutaneous injection [27].

## **Ethics Statement**

This study was conducted in accordance with legal ethical guidelines of the medical ethics committee of the Theodor Bilharz Research institute (TBRI) , Giza, Egypt. Approval no. 4013/2016.

## **Experimental design**

Mice were divided into 4 groups, 10-13 mice each, representing: AG treated group, PZQ treated group, AG+PZQ treated group and untreated infected control group. AG group mice were treated daily starting from the 1<sup>st</sup> day post-infection (p.i) till the 21<sup>st</sup> day using a dose of 1gm/kg body weight (AG is a powdered material obtained from local conventional herbal medicine market, suspended in water as a solvent reagent at a concentration of 100mg/ml). This dose was similar to that of Nasir *et al.* 2012 [17], but given individually to each mouse orally using a syringe with a curved end. On the 21<sup>st</sup> & 22<sup>nd</sup> day PZQ (Alexandria Company for Pharmaceuticals and Chemical Industries, Alex., Egypt) was freshly suspended in 13 ml of 2% cremophore-EL (Sigma Chemical Co., USA) and orally administered to mice at a dose of 500 mg/kg body weight for two consecutive days [28]. Three weeks later (6 weeks p.i) all animals were scarified to assess AG antischistosomal efficacy.

## **Evaluation of AG antischistosomal effect**

### **1. Worm Burden**

Schistosomes recovery was done by porto-mesenteric perfusion technique, 3 weeks post-treatment, according to the method of Duvall and DeWitt, [29]. Drug efficacy was measured by percent reduction of worms according to the formula of Abdel Salam et al., [30]:  $R\%$  (percent reduction) =  $C-T/C \times 100$ , where  $C$  is the mean worm burdens in control infected animals and  $T$ , mean number of worms in infected treated animals.

## 2. Tissue egg load (hepatic and intestinal)

Segments of liver and intestine were blotted between two filter papers, weighed, transferred each to a test tube containing 5 ml 5% potassium hydroxide solution [31], and left overnight at room temperature to facilitate tissue digestion without egg destruction. Next morning, tubes were incubated at 37°C for 1 h to finish the tissue clearance [32]. Ova in homogenous emulsions were counted after being spread on slides, and the number of ova/mg tissues was calculated. To detect the egg load in the hepatic and intestinal tissue, the average number of eggs in 1 ml sample was multiplied by the total volume of potassium hydroxide, then divided by the weight of tissue to yield the number of eggs/gram tissue [33]. Percentage reduction was accordingly calculated.  $R\%$  (percent reduction) =  $C-T/C \times 100$ , percentage reduction was calculated using the aforementioned equation [30].

## 3. Oogram pattern

After mice perfusion, three segments, one cm in length of the small intestine were cut longitudinally, rinsed in saline, slightly dried on filter paper, compressed between two glass slides and examined under microscope for oogram pattern that may reflect the direct drug action on ova development [34]. Eggs of *S. mansoni* were classified in the current study in three types immature, mature and dead [35].

#### 4. Histopathological examination

Mice livers were fixed for 48 h in 10% buffered formalin and then embedded in paraffin. Haematoxylin and eosin were used to stain sections [36] for granuloma counting while Masson trichrome stains [37] were used to demonstrate collagen fibers. Lesions containing single ova in their centers were selected for measurement [38]. The granuloma diameter of each case was measured using the ocular micrometer [39]. For each section, granulomas were counted in five successive fields (10x10).

#### Statistical analysis

Gathered data were tabulated and analyzed using SPSS statistical software (IBM Corp., Armonk, NY, USA). Data were expressed as mean  $\pm$ SD or SE. Analysis of variance between groups was done using ANOVA test and when significant, post hoc Bonferroni test was applied for pairwise comparison between groups. P value <0.05 was considered statistically significant. All statistical tests were two-sided. Chi square test was used to assess if there was a significant difference between granuloma types in various study groups.

#### Results

Regarding the worm load, the AG group demonstrated the best reduction rate (75.6%) followed by the AG+PZQ group (72.5%) while the PZQ group had the lowest rate (28.7%). The difference between all groups was statistically significant (P-value <0.001). Comparing each group with the control group, the difference was significant except for the PZQ group (P-value 0.151). While comparing the PZQ group with the AG group and with the AG+PZQ group the difference is statistically significant (P-value 0.002 and 0.008 respectively), Table 1.



**Table 1. Performance of AG, PZQ and combined AG+PZQ therapeutic regimens on *Schistosoma mansoni* total worm burden after treatment of infected mice during the immature infection stage.**

| Group<br>Result  |                      | Control | AG      | AG+PZQ  | PZQ      | P value* |
|------------------|----------------------|---------|---------|---------|----------|----------|
|                  |                      |         |         |         |          |          |
| Total worm count | Mean±SD              | 16±5.2  | 3.9±2.5 | 4.4±2.6 | 11.4±1.8 | <0.001   |
|                  | (range)              | (11–24) | (0–8)   | (2–8)   | (9–13)   |          |
|                  | Reduction rate (R.R) | -       | 75.6%   | 72.5%   | 28.7%    |          |
|                  | P versus control     |         | <0.001* | <0.001* | 0.151    |          |
|                  | P vs AG              |         |         | 1       | 0.002*   |          |
|                  | P vs AG+PZQ          |         |         |         | 0.008*   |          |

AG: Arabic gum.

PZQ: Praziquantel.

About egg count in the liver, the AG+PZQ had the lowest number (950±498.8), followed by the PZQ group (1964.8±909), then the AG group (2315.8±252.7) and the highest number belonged to the control group (8507.4±915.2), with statistically significant difference (P-value <0.001). Comparing each group with the control group, the difference was significant (P-value <0.001). The AG+PZQ group demonstrated the best hepatic egg

195 load reduction rate (88.8 %) followed by the PZQ group (76.9%) while the AG group had  
196 the lowest rate (72.7%). Comparing the result of the AG group with that of the AG+PZQ  
197 group revealed a statistically significant difference (P-value 0.010) while comparing it to  
198 that of the PZQ group revealed a non-significant difference (P-value 1). Similarly,  
199 comparing the result of the AG+PZQ group to that of the PZQ group revealed a non-  
200 significant difference (P-value 0.226).

201 A similar pattern was noted for the intestinal egg load as the AG+PZQ had the lowest  
202 number ( $961.1 \pm 387.2$ ), followed by the PZQ group ( $1121.8 \pm 629$ ), then the AG group  
203 ( $3168.8 \pm 1016.7$ ) and the highest number belonged to the control group ( $7205.1 \pm 1049.6$ ),  
204 with statistically significant difference (P-value  $<0.001$ ). Comparing each group with the  
205 control group, the difference was significant (P-value  $<0.001$ ). The AG+PZQ group  
206 demonstrated the best intestinal egg load reduction rate (86.6 %) followed by the PZQ  
207 group (84.4 %) while the AG group had the lowest rate (56%). Comparing the AG group  
208 to either AG+PZQ or PZQ group yielded a statistically significant difference (P-value  
209  $<0.001$  and  $0.001$  respectively), while comparing the PZQ and AG+PZQ groups yielded a  
210 non-significant difference (P-value 1). Table 2.

211 **Table 2. Comparison between the reductive effect of AG, PZQ and combined AG+**  
212 **PZQ therapeutic regimens reductive effect on *Schistosoma mansoni* liver and**  
213 **intestinal egg count after treatment of infected mice during the immature infection**  
214 **stage.**

| Group | Control | AG | AG+PZQ | PZQ | P value<br>between all |
|-------|---------|----|--------|-----|------------------------|
|-------|---------|----|--------|-----|------------------------|

| Result               |                         |               |               |             |             | groups |
|----------------------|-------------------------|---------------|---------------|-------------|-------------|--------|
| Liver egg count      | Mean±SD                 | 8507.4±915.2  | 2315.8±252.7  | 950±498.8   | 1964.8±9097 | <0.001 |
|                      | (range)                 | (7830–10434)  | (1418–3724)   | (392–1818)  | (963–2750)  |        |
|                      | R. R                    | --            | 72.7%         | 88.8 %      | 76.9%       |        |
|                      | <i>P</i> versus control |               | <0.001*       | <0.001*     | <0.001*     |        |
|                      | <i>P</i> vs AG          |               |               | 0.010*      | 1           |        |
| Intestinal egg count | <i>P</i> vs AG+PZ       |               |               |             | 0.226       | <0.001 |
|                      | Q                       |               |               |             |             |        |
|                      | Mean+SD                 | 7205.1±1049.6 | 3168.8±1016.7 | 961.1±387.2 | 1121.8±629  |        |
|                      | (range)                 | (5809–8600)   | (19787–4851)  | (484–1720)  | (528–1818)  |        |
|                      | R. R                    | --            | 56%           | 86.6%       | 84.4%       |        |
| Intestinal egg count | P versus control        |               | <0.001*       | <0.001*     | <0.001*     | <0.001 |
|                      | P vs AG                 |               |               | <0.001*     | 0.001*      |        |
|                      | P vs                    |               |               |             | 1           |        |
|                      |                         |               |               |             |             |        |

|  |        |  |  |  |  |  |
|--|--------|--|--|--|--|--|
|  | AG+PZQ |  |  |  |  |  |
|--|--------|--|--|--|--|--|

215 AG: Arabic gum.

216 PZQ: Praziquantel.

217 Concerning the oogram pattern, the AG+PZQ presented the best results demonstrating  
 218 the lowest immature egg count ( $45 \pm 1.7$ ), followed by the PZQ group ( $51.8 \pm 1.8$ ), then the  
 219 AG group ( $54.9 \pm 6.4$ ) and the highest number belonged to the control group ( $51.1 \pm 4.6$ ),  
 220 yet the difference was insignificant (P-value 0.015). Comparing each group with the  
 221 control group, the difference was also insignificant. Comparing the result of the AG  
 222 group with that of the AG+PZQ group revealed a statistically significant difference (P-  
 223 value 0.009) while comparing it to that of the PZQ group revealed a non-significant  
 224 difference (P-value 1). Similarly, comparing the result of the AG+PZQ group to that of  
 225 the PZQ group revealed a non-significant difference (P-value 0.306).

226 The mature egg count was ( $40.4 \pm 4.9$ ) in the AG+PZQ group, ( $42 \pm 2.1$ ) in the PZQ group,  
 227 and ( $40 \pm 6.7$ ) in the AG group. The difference between each group and the control group  
 228 was statistically insignificant. Comparing the AG group to either AG+PZQ or PZQ  
 229 group, as well as comparing the AG+PZQ groups yielded non-significant differences (P-  
 230 value 1, 1 and 1 respectively).

231 While regarding the dead egg count, the highest number was detected in the AG+PZQ  
 232 ( $5-25$ , Mean  $\pm$ SD  $14.6 \pm 6.8$ ), followed by the control group ( $4-10$ , Mean  $\pm$ SD  $6.3 \pm 2.1$ ),  
 233 then, the PZQ group ( $5-8$ , Mean  $\pm$ SD  $6.2 \pm 1.3$ ). When each group was compared to the  
 234 control group the difference was statistically insignificant (P-value 1 and 1) except for the  
 235 AG+PZQ group (P-value 0.001). While comparing the AG group with the AG+PZQ

group the difference is statistically significant (P-value <0.001) and statistically insignificant when compared with the PZQ group (P-value 1). On the other side, the difference between the PZQ and the AG+PZQ groups was statistically significant (P-value 0.003), Table 3.

**Table 3. Oogram pattern of AG, PZQ and combined AG+PZQ therapeutic regimens after treatment of infected mice during the immature infection stage.**

| <div>Group</div> <div>Result/egg type</div> |                  | Control        | AG             | AG+PZQ         | PZQ            | P value between all groups |
|---------------------------------------------|------------------|----------------|----------------|----------------|----------------|----------------------------|
| Immature eggs                               | Mean $\pm$ SD    | 51.1 $\pm$ 4.6 | 54.9 $\pm$ 6.4 | 45 $\pm$ 7.1   | 51.8 $\pm$ 1.8 | 0.015                      |
|                                             | (range)          | (42–55)        | (45–65)        | (35–55)        | (50–54)        |                            |
|                                             | P versus control |                | 1              | 0.320          | 1              |                            |
|                                             | P vs AG          |                |                | 0.009*         | 1              |                            |
| Mature eggs                                 | P vs AG+PZQ      |                |                |                | 0.306          | 0.715                      |
|                                             | Mean $\pm$ SD    | 42.6 $\pm$ 3.2 | 40 $\pm$ 6.7   | 40.4 $\pm$ 4.9 | 42 $\pm$ 2.1   |                            |
|                                             | (range)          | (40–48)        | (30–50)        | (33–45)        | (40–45)        |                            |

|                  |                  |               |               |                |               |        |
|------------------|------------------|---------------|---------------|----------------|---------------|--------|
|                  | P versus control |               | 1             | 1              | 1             |        |
|                  | P vs AG          |               |               | 1              | 1             |        |
|                  | P vs AG+PZQ      |               |               |                | 1             |        |
| <b>Dead eggs</b> | Mean $\pm$ SD    | 6.3 $\pm$ 2.1 | 5.1 $\pm$ 0.9 | 14.6 $\pm$ 6.8 | 6.2 $\pm$ 1.3 | <0.001 |
|                  | (range)          | 4–10          | 4–7           | 5–25           | 5–8           |        |
|                  | P versus control |               | 1             | 0.001*         | 1             |        |
|                  | P vs AG          |               |               | <0.001*        | 1             |        |
|                  | P vs AG+PZQ      |               |               |                | 0.003*        |        |

242 AG: Arabic gum.

243 PZQ: Praziquantel.

244 The histopathological assessment of the granuloma diameter revealed that the smallest  
245 diameter belonged to the AG+PZQ (214.23 $\pm$ 12.18), followed by the PZQ group  
246 (272.22 $\pm$ 11.2), then the AG group (297.28 $\pm$ 7.5) and the largest diameter belonged to the  
247 control group (353.15 $\pm$ 12.4). Comparing each group with the control group, the  
248 difference was significant (P-value 0.0010, 0.0010 & 0.0001 for the AG, PZQ and  
249 AG+PZQ groups respectively).

On the other side, the AG+PZQ group demonstrated the lowest granuloma number (3.32±1.21), followed by the AG group (3.9±1.13), then the PZQ group (5.4±1.82), and the control group presented the highest granuloma number (10.62±1.97). Comparing each group with the control group, both the AG and AG+PZQ showed a significant difference (P-value 0.0064&0.0064 respectively) while the difference between the PZQ group and the control group was insignificant (P-value 0.09).

While results of the granuloma type revealed that the AG group had the highest cellular and the least fibro-cellular and fibrous types among all groups (80%,20% &0%), followed by AG+PZQ group (65%, 30%&5%) and the last in order was the PZQ group (55%,43%&2%). Only AG and AG+PZQ had significantly different granuloma types as compared to the control group (P-value <0.001&0.022 respectively), while the types distribution in the PZQ group was insignificantly different than that of the control group (P-value 0.247).

The State of *S. mansoni* eggs demonstrated a different pattern as the lowest number of intact eggs and the highest number of degenerated eggs was detected in the AG group (17 &83 respectively), while the AG+PZQ group had (23) intact eggs and (77) degenerated eggs, and the PZQ group had (45) intact eggs and (55) degenerated eggs. Comparing each group with the control group, the difference was significant (P-value <0.001). Table 4 and Fig 1.

**Table 4. Effect of AG, PZQ and combined AG+PZQ treatment regimens on *Schistosoma mansoni* induced hepatic granulomas parameters as compared with the control group**





|  |          |         |        |         |
|--|----------|---------|--------|---------|
|  | =0.0001* | 0.0083* | 0.022* | <0.001* |
|--|----------|---------|--------|---------|

272 AG; Arabic gum.

273 PZQ; Praziquantel.

274 **Fig 1.:** Liver histology at six weeks after *S. mansoni* infection of CD1 bred mice with 80  
275 cercariae by subcutaneous injection (hematoxylin & eosin stain: 100x magnification)

276 1-A:liver infected sections non treated control mice groups 6 weeks p.i. showing large  
277 number of fibrocellular granulomas stained with H&E (x100)

278 1-B:liver infected sections non treated control mice groups 6 weeks p.i. showing large  
279 number of fibrocellular granulomas stained with masson trichrome stain (x100)

280 1-C: Liver of infected mice group treated PZQ  
281 showing less number of fibrocellular granuloma

282 1-D: Liver of infected mice group treated PZQ showing decrease in granuloma size  
283 showing small fibrous granuloma

284 1-E: Liver of infected mice group treated with AG and PZQ showing less number of  
285 cellular granuloma

286 1-F: Liver of infected mice group treated with AG and PZQ showing decrease in the  
287 granuloma size showing small granuloma with degenerated eggs

288 1-G: Liver of infected mice group treated with AG showing decrease in size of  
289 granulomas

1-H: Liver of infected mice group treated with AG showing decrease in size of granulomas degenerated eggs

## Discussion

Schistosomiasis control programs are based mainly on a single drug which is praziquantel tablet [40]. Despite the fact that patients could tolerate PZQ well, it has some drawbacks including the emergence of drug resistance [4, 5], the poor efficacy on the immature stages [41], the large, bitter tablets, and the unavailability of a pediatric formula [42]. Recently, natural products and natural product-derived compounds have been popular and attracted most of the attention as it could offer new effective therapy against schistosomiasis. Arabic gum (AG) is an edible, dried sticky exudate from *Acacia Senegal*, which is rich in soluble dietary fiber [43].

In this study assessment of AG antischistosomal properties revealed an excellent statistically significant effect against immature murine schistosomiasis, both alone and in combination with PZQ demonstrated in parasitological parameters; worm load, egg count, oogram pattern and histopathological results; granuloma metrics (diameter, number, and state of *Schistosoma* eggs within them).

In all parasitological parameters, apart from the worm load, AG+PZQ treated animals showed the best results as compared to monotherapy groups, denoting a considerable synergistic effect of AG+PZQ on both female fecundity, egg maturation and ability to elicit its immunopathological effect. The best reduction rate of *Schistosoma* worms was demonstrated in the AG monotherapy group, nevertheless, the difference

between AG and AG+PZQ treated mice worm load was negligible. On the contrary, the PZQ treated mice demonstrated the worst results among all studied groups regarding total worm load, however, such results were expected as PZQ is less effective against immature schistosomiasis, the stage targeted in this experiment.

Regarding the histopathological parameters, the AG+PZQ group showed the least mean granuloma diameter, while the largest diameter was demonstrated in the AG group. This could be explained by the fact that the granuloma of that group is the highest cellular, the least fibrocellular and fibrous granuloma types, lacking adequate fibers amount diminishes its contraction and permits large sizes. Another explanation is based on the highly significant difference in *S. mansoni* intact -degenerated eggs distribution within the examined granulomas, as the cellularity that dominated granulomas of AG treated animals might eliminate the physical barriers which would be created by fibrous tissue and hampers the action of the host immune system. Concerning the mean granuloma number, AG was significantly effective, both alone and in combination with PZQ, followed by the combination of AG+PZQ and the least effect belonged to the PZQ monotherapy. These results could be attributed to the destructive effect of AG on fecundity which in turn decreases the number of evolving granulomas.

The AG therapeutic effect on immature murine schistosomiasis in this experiment could be attributed to its immunomodulatory effect, as it stimulates the dendritic cells [14] which are antigen-presenting cells responsible for triggering both innate and adaptive immunity [44].

Also, it might be attributed to the antioxidant properties of AG in many tissues like renal tissue [16], RBCs in sickle cell anemia (SCA) disease [19] and hepatic tissue as

mentioned by Ahmed *et al.*, [45] who stated that AG significantly decreased the level of hepatic enzymes, lipid peroxidation, antioxidant enzymes as well as the expression of oxidative stress genes. Activities of superoxide dismutase (SOD), catalase (CAT) and glutathione peroxidase (GPx), which may contribute to the alleviation of *Schistosoma mansoni* infection consequences similar to what has been reported in many other antioxidants like gold nanoparticles *Ceratonia siliqua* pod extract [46], limonin [47]. Another theoretically potential mechanism of AG action relies on the fact that its administration enhances butyric acid production in the bowel and hence rising its serum concentration [13].

Butyric acid is a short chain fatty acid (SCFA) that synthesized via the fermentation of otherwise non-digestible fiber by bacteria in the colon [48]. It has four actions; first, it raises IL 10 serum level [14, 49], second, it increases serum levels of IL-1 receptor antagonist (IL-1RA), third, it suppresses synthesis of transforming growth factor (TGF- $\beta$ 1) [13] and fourth, it fosters the expression of fetal hemoglobin in erythrocytes [26]. Each of the aforementioned actions has a direct effect on schistosomiasis infection outcome; IL10 regulates not just the intensity of egg-induced inflammatory responses, but also the coherence of granuloma structure, particularly deposition of collagen by fibroblasts around the periphery [50]. It also downregulates B7 MHC II, costimulatory molecules on APC [51], leading to hyporesponsive state through induction of T cells energy [52]. IL-1RA was reported before to cause *in vivo* depletion of exacerbated granuloma size and augmented regional cytokine production [53].

The effect of both IL 10 & IL-1RA might be manifested in this experiment in decreased granuloma diameters, fibrosis, increased cellularity and deteriorated *Schistosoma* eggs status inside the lesions.

Transforming growth factor (TGF- $\beta$ 1) is one of the strongest factors that lead to liver fibrosis. TGF- $\beta$ 1 promotes hepatic stellate cell (HSC) proliferation and collagen synthesis in the activated HSC [54] or modulates deposition of extracellular matrix (ECM) components and immune functions [55]. Furthermore, a number of researchers have recognized TGF- $\beta$ 1 inhibition as one of the factors that can be used to evaluate the antifibrotic effects of drugs on hosts infected with *Schistosoma japonicum* [56]. Consequently, possible suppression of TGF- $\beta$ 1 by AG could reverse the immunopathologic effect induced by *Schistosoma* eggs in the affected tissues as seen in the current study.

Blood-feeding parasites, including schistosomes, hookworms, and malaria parasites, make use of aspartic proteases to produce initial or early cleavages in ingested host hemoglobin. Although phylogenetically distinct, these parasites all have the same food source; they are obligate blood feeders, or hematophagous. Hb from ingested or parasitized erythrocytes is their major source of exogenous amino acids for growth, development, and reproduction; the Hb, a 64-kDa tetrameric polypeptide, is broadly catabolized by parasite enzymes to free amino acids or small peptides [57].

The fact that fetal hemoglobin has been shown to slowdown hemoglobin degradation depriving *Schistosoma* worms of its food source [58], has inspired many researchers to evaluate the effect of increasing its production on murine malaria

parasitemia [26], they reported that the administration of Arabic gum significantly decreased the parasitaemia and extended the lifespan of infected mice.

The present study demonstrated that AG was highly effective against the immature form of *S. mansoni* which resists PZQ, and using both agents together yielded the best results owing to their synergetic effect.

To recapitulate, the study in hands shed the light on a novel and “green” management approach of *Schistosomiasis mansoni*, being one of the safest dietary fibers, and perceptibly effective in treating immature forms which entails the abortion of reinfection in endemic areas. Further studies are on a larger scale are required to evaluate the feasibility of using AG as an effective treatment of immature schistosomiasis *mansoni* and for prophylaxis against reinfection, particularly in endemic areas where the control programs are continually hampered by many socioeconomic, topographic and cultural obstacles that are not currently anticipated to be defeated in the near future.

## References

1. Steinmann P, Keiser J, Bos R, Tanner M, Utzinger J. Schistosomiasis and water resources development: systematic review, meta-analysis, and estimates of people at risk. *The Lancet infectious diseases*. 2006;6(7):411-25.
2. King CH, Dangerfield-Cha M. The unacknowledged impact of chronic schistosomiasis. *Chronic illness*. 2008;4(1):65-79.
3. Taylor M. Global trends in schistosomiasis control. *Bulletin of the World Health Organization*. 2008;86(10):738-.

- 400 4. Fallon PG, Doenhoff MJ. Drug-resistant schistosomiasis: resistance to  
401 praziquantel and oxamniquine induced in *Schistosoma mansoni* in mice is drug specific.  
402 The American journal of tropical medicine and hygiene. 1994;51(1):83-8.
- 403 5. Ismail M, Botros S, Metwally A, William S, Farghally A, Tao L-F, et al.  
404 Resistance to praziquantel: direct evidence from *Schistosoma mansoni* isolated from  
405 Egyptian villagers. The American journal of tropical medicine and hygiene.  
406 1999;60(6):932-5.
- 407 6. Ribeiro-dos-Santos G, Verjovski-Almeida S, Leite LC. Schistosomiasis—a  
408 century searching for chemotherapeutic drugs. Parasitology research. 2006;99(5):505.
- 409 7. Wang W, Wang L, Liang Y-S. Susceptibility or resistance of praziquantel in  
410 human schistosomiasis: a review. Parasitology research. 2012;111(5):1871-7.
- 411 8. Doenhoff MJ, Cioli D, Utzinger J. Praziquantel: mechanisms of action, resistance  
412 and new derivatives for schistosomiasis. Current opinion in infectious diseases.  
413 2008;21(6):659-67.
- 414 9. Botros S, William S, Hammam O, Holý A. Activity of 9-(S)-[3-hydroxy-2-  
415 (phosphonomethoxy) propyl] adenine against *Schistosomiasis mansoni* in mice.  
416 Antimicrobial agents and chemotherapy. 2003;47(12):3853-8.
- 417 10. Rehan A, Johnson KJ, Kunkel RG, Wiggins RC. Role of oxygen radicals in  
418 phorbol myristate acetate-induced glomerular injury. Kidney international.  
419 1985;27(3):503-11.
- 420 11. Al-Majed AA, Mostafa AM, Al-Rikabi AC, Al-Shabanah OA. Protective effects  
421 of oral arabic gum administration on gentamicin-induced nephrotoxicity in rats.  
422 Pharmacological Research. 2002;46(5):445-51.

423 12. Anderson D. Evidence for the safety of gum arabic (*Acacia senegal* (L.) Willd.) as  
424 a food additive—a brief review. *Food Additives & Contaminants*. 1986;3(3):225-30.

425 13. Matsumoto N, Riley S, Fraser D, Al-Assaf S, Ishimura E, Wolever T, et al.  
426 Butyrate modulates TGF- $\beta$ 1 generation and function: Potential renal benefit for *Acacia*  
427 (sen) SUPERGUM™(gum arabic)? *Kidney international*. 2006;69(2):257-65.

428 14. Xuan NT, Shumilina E, Nasir O, Bobbala D, Götz F, Lang F. Stimulation of  
429 mouse dendritic cells by Gum Arabic. *Cellular Physiology and Biochemistry*.  
430 2010;25(6):641-8.

431 15. Pradeep A, Happy D, Garg G. Short-term clinical effects of commercially  
432 available gel containing *Acacia arabica*: a randomized controlled clinical trial. *Australian*  
433 *dental journal*. 2010;55(1):65-9.

434 16. Gado AM, Aldahmash BA. Antioxidant effect of Arabic gum against mercuric  
435 chloride-induced nephrotoxicity. *Drug design, development and therapy*. 2013;7:1245.

436 17. Nasir O, Umbach AT, Rexhepaj R, Ackermann TF, Bhandaru M, Ebrahim A, et  
437 al. Effects of gum arabic (*Acacia senegal*) on renal function in diabetic mice. *Kidney and*  
438 *Blood Pressure Research*. 2012;35(5):365-72.

439 18. Nasir O. Renal and Extrarenal Effects of Gum Arabic (*Acacia Senegal*)-What Can  
440 be Learned from Animal Experiments? *Kidney and Blood Pressure Research*. 2013;37(4-  
441 5):269-79.

442 19. Kaddam L, FdleAlmula I, Eisawi OA, Abdelrazig HA, Elnimeiri M, Lang F, et al.  
443 Gum Arabic as fetal hemoglobin inducing agent in sickle cell anemia; in vivo study.  
444 *BMC hematology*. 2015;15(1):19.



- 445 20. Al-Yahya AA, Asad M. Antiulcer activity of gum arabic and its interaction with  
446 antiulcer effect of ranitidine in rats. Biomedical Research. 2016;27(4).
- 447 21. Ahmed AA, Fedail JS, Musa HH, Musa TH, Sifaldin AZ. Gum Arabic  
448 supplementation improved antioxidant status and alters expression of oxidative stress  
449 gene in ovary of mice fed high fat diet. Middle East Fertility Society Journal.  
450 2016;21(2):101-8.
- 451 22. Fedail JS, Ahmed AA, Musa HH, Ismail E, Sifaldin AZ, Musa TH. Gum arabic  
452 improves semen quality and oxidative stress capacity in alloxan induced diabetes rats.  
453 Asian Pacific Journal of Reproduction. 2016;5(5):434-41.
- 454 23. Clark D, Gazi M, Cox S, Eley B, Tinsley G. The effects of Acacia arabica gum on  
455 the in vitro growth and protease activities of periodontopathic bacteria. Journal of clinical  
456 periodontology. 1993;20(4):238-43.
- 457 24. Saini ML, Saini R, Roy S, Kumar A. Comparative pharmacognostical and  
458 antimicrobial studies of Acacia species (Mimosaceae). Journal of Medicinal Plants  
459 Research. 2008;2(12):378-86.
- 460 25. Singh B, Dubey S, Siddiqui M. Antimicrobial activity of natural edible gums.  
461 Journal of Pharmaceutical Sciences. 2015;3(11):2217-21.
- 462 26. Ballal A, Bobbala D, Qadri SM, Föller M, Kempe D, Nasir O, et al. Anti-malarial  
463 effect of gum arabic. Malaria journal. 2011;10(1):139.
- 464 27. Holanda J, Pellegrino J, Gazzinelli G. Infection of mice with cercariae and  
465 schistosomula of *Schistosoma mansoni* by intravenous and subcutaneous routes. Revista  
466 do Instituto de Medicina Tropical de Sao Paulo. 1974;16(3):132-4.

467 28. Nessim NG, Demerdash Z. Correlation between infection intensity, serum  
468 immunoglobulin profile, cellular immunity and the efficacy of treatment with  
469 praziquantel in murine schistosomiasis mansoni. *Arzneimittelforschung*.  
470 2000;50(02):173-7.

471 29. Duvall RH, DeWitt WB. An improved perfusion technique for recovering adult  
472 schistosomes from laboratory animals. *The American journal of tropical medicine and*  
473 *hygiene*. 1967;16(4):483-6.

474 30. Abdel-Salam A, Ammar N, Abdel-Hamid A. Effectiveness of probiotic Labneh  
475 supplemented with garlic or onion oil against *Schistosoma mansoni* in infected mice. *Int J*  
476 *Dairy Sci*. 2008;3(2):97-104.

477 31. Cheever AW. Quantitative comparison of the intensity of *Schistosoma mansoni*  
478 infections in man and experimental animals. *Transactions of the Royal Society of*  
479 *Tropical Medicine and Hygiene*. 1969;63(6):781-95.

480 32. Selem RF, Eraky MA. Assessment of mefloquine in-vivo efficacy on juvenile and  
481 adult stages of *Schistosoma haematobium* (Egyptian strain). *Parasitologists United*  
482 *Journal*. 2015;8(1):60.

483 33. Cheever AW. Conditions affecting the accuracy of potassium hydroxide digestion  
484 techniques for counting *Schistosoma mansoni* eggs in tissues. *Bulletin of the World*  
485 *Health Organization*. 1968;39(2):328.

486 34. Pellegrino J, Oliveira CA, Faria J, Cunha AS. New approach to the screening of  
487 drugs in experimental schistosomiasis mansoni in mice. *The American journal of tropical*  
488 *medicine and hygiene*. 1962;11(2):201-15.

- 489 35. Cançado JR, da Cunha AS, de Carvalho DG, Cambraia JS. Evaluation of the  
490 treatment of human *Schistosoma mansoni* infection by the quantitative oogram technique.  
491 Bulletin of the World Health Organization. 1965;33(4):557.
- 492 36. Harris H. On the rapid conversion of haematoxylin into haematein in staining  
493 reactions. Journal of Applied Microscopic Laboratory Methods. 1900;3(3):777.
- 494 37. Masson P. Some histological methods: trichrome stainings and their preliminary  
495 technique. J Tech Methods. 1929;12:75-90.
- 496 38. Botros S, El-Badrawy N, Metwally A, Khayyal M. Study of some  
497 immunopharmacological properties of praziquantel in experimental schistosomiasis  
498 *mansoni*. Annals of Tropical Medicine & Parasitology. 1986;80(2):189-96.
- 499 39. Lichtenberg Fv. Host response to eggs of *S. mansoni*: I. Granuloma formation in  
500 the unsensitized laboratory mouse. The American Journal of Pathology. 1962;41(6):711.
- 501 40. Savioli L, Daumerie D. Sustaining the drive to overcome the global impact of  
502 neglected tropical diseases: second WHO report on neglected tropical diseases: World  
503 Health Organization; 2013.
- 504 41. Botelho MC, Oliveira PA, Vieira P, Delgado MdL, Lourenço L, Lopes C, et al.  
505 Granulomatous-like immune reaction and hepatic fibrosis induced by *Schistosoma*  
506 *haematobium* immature worms. Virulence. 2010;1(3):123-9.
- 507 42. Colley DG. Morbidity control of schistosomiasis by mass drug administration:  
508 how can we do it best and what will it take to move on to elimination? Tropical medicine  
509 and health. 2014;42(2SUPPLEMENT):S25-S32.
- 510 43. Ali BH, Ziada A, Blunden G. Biological effects of gum arabic: a review of some  
511 recent research. Food and Chemical Toxicology. 2009;47(1):1-8.

- 512 44. van Duivenvoorde LM, Han WG, Bakker AM, Louis-Plence P, Charbonnier L-M,  
513 Apparailly F, et al. Immunomodulatory dendritic cells inhibit Th1 responses and arthritis  
514 via different mechanisms. *The Journal of Immunology*. 2007;179(3):1506-15.
- 515 45. Ahmed AA, Fedail JS, Musa HH, Kamboh AA, Sifaldin AZ, Musa TH. Gum  
516 Arabic extracts protect against hepatic oxidative stress in alloxan induced diabetes in rats.  
517 *Pathophysiology*. 2015;22(4):189-94.
- 518 46. Al-Olayan EM, El-Khadragy MF, Alajmi RA, Othman MS, Bauomy AA, Ibrahim  
519 SR, et al. Ceratonia siliqua pod extract ameliorates Schistosoma mansoni-induced liver  
520 fibrosis and oxidative stress. *BMC complementary and alternative medicine*.  
521 2016;16(1):434.
- 522 47. Soliman R, Ismail O, Badr M, Nasr S. Resveratrol ameliorates oxidative stress  
523 and organ dysfunction in Schistosoma mansoni infected mice. *Experimental parasitology*.  
524 2017;174:52-8.
- 525 48. Pryde SE, Duncan SH, Hold GL, Stewart CS, Flint HJ. The microbiology of  
526 butyrate formation in the human colon. *FEMS microbiology letters*. 2002;217(2):133-9.
- 527 49. West NP, Christophersen CT, Pyne DB, Cripps AW, Conlon MA, Topping DL, et  
528 al. Butyrylated starch increases colonic butyrate concentration but has limited effects on  
529 immunity in healthy physically active individuals. *Exercise immunology review*.  
530 2013;19.
- 531 50. Sadler CH, Rutitzky LI, Stadecker MJ, Wilson RA. IL-10 is crucial for the  
532 transition from acute to chronic disease state during infection of mice with Schistosoma  
533 mansoni. *European journal of immunology*. 2003;33(4):880-8.

- 534 51. Ding L, Linsley P, Huang L, Germain R, Shevach E. IL-10 inhibits macrophage  
535 costimulatory activity by selectively inhibiting the up-regulation of B7 expression. The  
536 Journal of Immunology. 1993;151(3):1224-34.
- 537 52. King CL, Medhat A, Malhotra I, Nafeh M, Helmy A, Khaudary J, et al. Cytokine  
538 control of parasite-specific anergy in human urinary schistosomiasis. IL-10 modulates  
539 lymphocyte reactivity. The Journal of Immunology. 1996;156(12):4715-21.
- 540 53. Ruth JH, Bienkowski M, Warmington KS, Lincoln PM, Kunkel SL, Chensue SW.  
541 IL-1 receptor antagonist (IL-1ra) expression, function, and cytokine-mediated regulation  
542 during mycobacterial and schistosomal antigen-elicited granuloma formation. The  
543 Journal of Immunology. 1996;156(7):2503-9.
- 544 54. Bowen T, Jenkins RH, Fraser DJ. MicroRNAs, transforming growth factor beta-1,  
545 and tissue fibrosis. The Journal of pathology. 2013;229(2):274-85.
- 546 55. Verrecchia F, Mauviel A. Transforming growth factor- $\beta$  signaling through the  
547 Smad pathway: role in extracellular matrix gene expression and regulation. Journal of  
548 Investigative Dermatology. 2002;118(2):211-5.
- 549 56. Chen B-L, Zhang G-Y, Wang S-P, Li Q, Xu M-H, Shen Y-M, et al. The  
550 combined treatment of praziquantel with osteopontin immunoneutralization reduces liver  
551 damage in Schistosoma japonicum-infected mice. Parasitology. 2012;139(4):522-9.
- 552 57. Brinkworth RI, Prociv P, Loukas A, Brindley PJ. Hemoglobin-degrading,  
553 Aspartic Proteases of Blood-feeding Parasites SUBSTRATE SPECIFICITY  
554 REVEALED BY HOMOLOGY MODELS. Journal of Biological Chemistry.  
555 2001;276(42):38844-51.

556 58. Shear HL, Grinberg L, Gilman J, Fabry ME, Stamatoyannopoulos G, Goldberg  
557 DE, et al. Transgenic mice expressing human fetal globin are protected from malaria by a  
558 novel mechanism. Blood. 1998;92(7):2520-6.

559



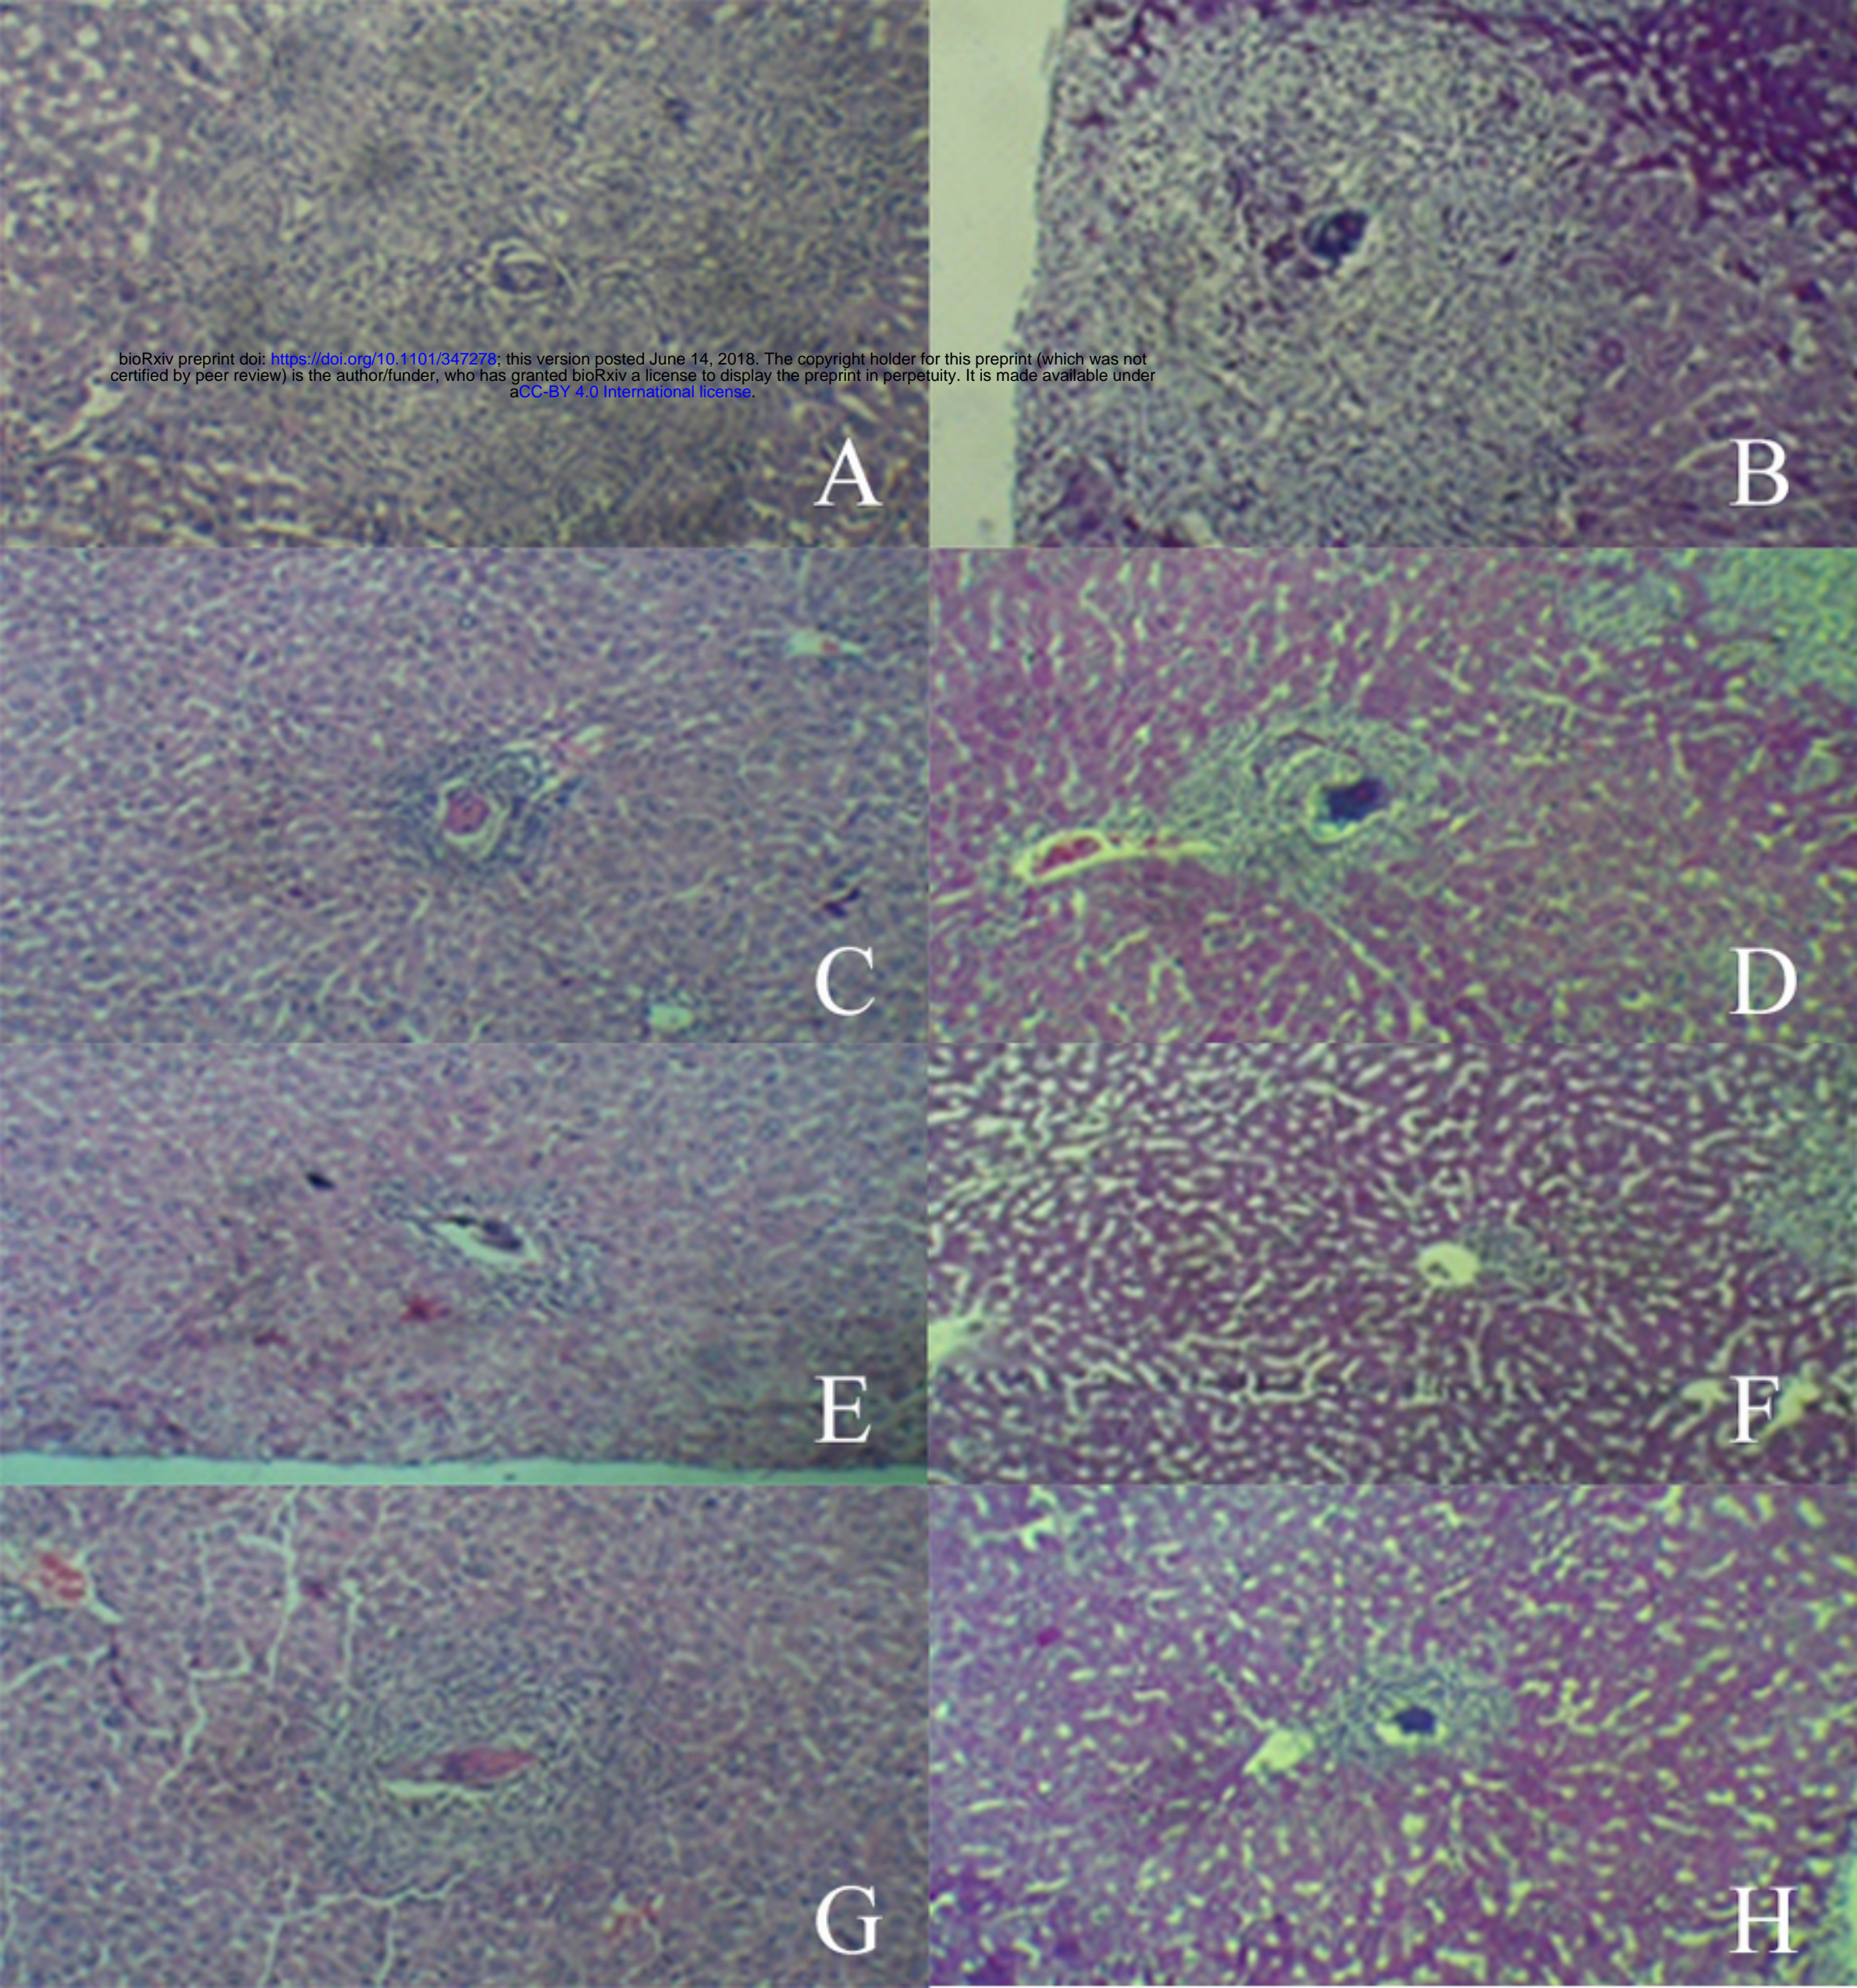

Source: https://www.biorxiv.org/content/biorxiv/early/2018/06/14/347278.full.pdf
